# Supplementary material for: Association between Lower Intake of Minerals and Depressive Symptoms among Elderly Japanese Women but Not Men: Findings from Shika Study
Source: PubMed Central journal article supplement (PMC6412241; doi:10.3390/nu11020389), 2019-02-13
Supplement: nutrients-11-00389-s001.pdf [file nutrients-11-00389-s001.pdf]

# Association between Lower Intake of Minerals and Depressive Symptoms among Elderly Japanese Women, but Not Men: Findings from Shika Study

Thao Thi Thu Nguyen\*, Sakae Miyagi, Hiromasa Tsujiguchi, Yasuhiro Kambayashi, Akinori Hara, Haruki Nakamura, Keita Suzuki, Yohei Yamada, Yukari Shimizu, and Hiroyuki Nakamura

## Supplementary

Table S1: The percentiles of mineral intake

| Mineral    | All population (n=1423)     |                             |                             | MALE (n=653)                |                             |                             | FEMALE (n=770)              |                             |                             |
|------------|-----------------------------|-----------------------------|-----------------------------|-----------------------------|-----------------------------|-----------------------------|-----------------------------|-----------------------------|-----------------------------|
|            | 25 <sup>th</sup> percentile | 50 <sup>th</sup> percentile | 75 <sup>th</sup> percentile | 25 <sup>th</sup> percentile | 50 <sup>th</sup> percentile | 75 <sup>th</sup> percentile | 25 <sup>th</sup> percentile | 50 <sup>th</sup> percentile | 75 <sup>th</sup> percentile |
| Sodium     | 2.12                        | 2.44                        | 2.78                        | 2.09                        | 2.43                        | 2.79                        | 2.15                        | 2.45                        | 2.78                        |
| Potassium  | 1.16                        | 1.40                        | 1.70                        | 1.09                        | 1.30                        | 1.57                        | 1.23                        | 1.49                        | 1.82                        |
| Calcium    | 238.98                      | 314.42                      | 387.83                      | 225.57                      | 299.08                      | 364.14                      | 253.98                      | 333.93                      | 411.43                      |
| Magnesium  | 120.64                      | 140.50                      | 164.80                      | 118.24                      | 135.92                      | 157.43                      | 122.50                      | 144.76                      | 170.07                      |
| Phosphorus | 505.67                      | 585.43                      | 672.83                      | 491.00                      | 564.22                      | 649.87                      | 523.73                      | 603.47                      | 698.72                      |
| Iron       | 3.60                        | 4.33                        | 5.13                        | 3.51                        | 4.12                        | 4.91                        | 3.73                        | 4.47                        | 5.30                        |
| Zinc       | 4.07                        | 4.50                        | 4.91                        | 4.00                        | 4.36                        | 4.81                        | 4.18                        | 4.59                        | 5.03                        |
| Copper     | 0.59                        | 0.65                        | 0.73                        | 0.57                        | 0.63                        | 0.71                        | 0.61                        | 0.67                        | 0.74                        |
| Manganese  | 1.34                        | 1.58                        | 1.91                        | 1.32                        | 1.56                        | 1.91                        | 1.36                        | 1.59                        | 1.91                        |

Table S2: Odd ratios and 95% CI for depressive symptoms across mineral intake

| Minerals   | Crude  |                     |         | Full-adjusted model <sup>‡</sup> |                     |         |
|------------|--------|---------------------|---------|----------------------------------|---------------------|---------|
|            | B      | OR (95% CI)         | p-value | B                                | OR (95% CI)         | p-value |
| Sodium     | -0.149 | 0.861 (0.675–1.099) | 0.229   | -0.241                           | 0.786 (0.607–1.018) | 0.068   |
| Potassium  | -0.678 | 0.508 (0.367–0.702) | <0.001  | -0.602                           | 0.548 (0.388–0.773) | 0.001   |
| Calcium    | -0.001 | 0.999 (0.997–1.000) | 0.015   | -0.001                           | 0.999 (0.998–1.000) | 0.089   |
| Magnesium  | -0.009 | 0.991 (0.987–0.995) | <0.001  | -0.007                           | 0.993 (0.989–0.997) | 0.001   |
| Phosphorus | -0.001 | 0.999 (0.998–1.000) | 0.019   | -0.001                           | 0.999 (0.998–1.000) | 0.144   |
| Iron       | -0.208 | 0.812 (0.722–0.914) | 0.001   | -0.202                           | 0.817 (0.722–0.925) | 0.001   |
| Zinc       | -0.255 | 0.775 (0.634–0.946) | 0.012   | -0.271                           | 0.762 (0.609–0.954) | 0.018   |
| Copper     | -1.515 | 0.220 (0.067–0.724) | 0.013   | -2.206                           | 0.110 (0.029–0.419) | 0.001   |
| Manganese  | -0.115 | 0.892 (0.678–1.172) | 0.411   | -0.249                           | 0.780 (0.585–1.038) | 0.088   |

B: coefficient, OR: odd ratio, CI: confidence interval

<sup>‡</sup>adjusted for age, BMI, living status, having a job status, married status, smoking status, drinking alcohol, alcohol consumption, total energy, hypertension, diabetes, hyperlipidemia

Table S3: Odd ratios and 95% CI for depressive symptoms across mineral intake levels

| Minerals   |            | Crude   |                       | Full-adjusted model <sup>¶</sup> |                       |
|------------|------------|---------|-----------------------|----------------------------------|-----------------------|
|            |            | $\beta$ | OR (95%CI)            | $\beta$                          | OR (95%CI)            |
| Sodium     | Quartile 1 |         | 1.000 (ref)           |                                  | 1.000 (ref)           |
|            | Quartile 2 | -0.279  | 0.757 (0.537–1.068)   | -0.506                           | 0.603 (0.407–0.893)*  |
|            | Quartile 3 | -0.210  | 0.810 (0.577–1.139)   | -0.195                           | 0.823 (0.566–1.197)   |
|            | Quartile 4 | -0.072  | 0.930 (0.667–1.298)   | -0.302                           | 0.739 (0.502–1.088)   |
|            | p-value    |         | 0.370                 |                                  | 0.084                 |
| Potassium  | Quartile 1 |         | 1.000 (ref)           |                                  | 1.000 (ref)           |
|            | Quartile 2 | -0.092  | 0.912 (0.664–1.253)   | 0.008                            | 1.008 (0.704–1.442)   |
|            | Quartile 3 | -0.501  | 0.606 (0.432–0.851)*  | -0.396                           | 0.673 (0.460–0.985)*  |
|            | Quartile 4 | -0.842  | 0.431 (0.299–0.620)** | -0.817                           | 0.442 (0.290–0.675)** |
|            | p-value    |         | <0.001                |                                  | <0.001                |
| Calcium    | Quartile 1 |         | 1.000 (ref)           |                                  | 1.000 (ref)           |
|            | Quartile 2 | -0.167  | 0.846 (0.610–1.174)   | -0.023                           | 0.977 (0.676–1.413)   |
|            | Quartile 3 | -0.457  | 0.633 (0.449–0.893)*  | -0.454                           | 0.635 (0.428–0.943)*  |
|            | Quartile 4 | -0.402  | 0.669 (0.476–0.940)*  | -0.263                           | 0.769 (0.523–1.130)   |
|            | p-value    |         | 0.030                 |                                  | 0.083                 |
| Magnesium  | Quartile 1 |         | 1.000 (ref)           |                                  | 1.000 (ref)           |
|            | Quartile 2 | -0.399  | 0.671 (0.484–0.931)   | -0.211                           | 0.810 (0.563–1.164)   |
|            | Quartile 3 | -0.449  | 0.638 (0.459–0.888)*  | -0.348                           | 0.706 (0.486–1.025)   |
|            | Quartile 4 | -0.801  | 0.449 (0.315–0.639)** | -0.620                           | 0.538 (0.361–0.802)*  |
|            | p-value    |         | <0.001                |                                  | 0.021                 |
| Phosphorus | Quartile 1 |         | 1.000 (ref)           |                                  | 1.000 (ref)           |
|            | Quartile 2 | -0.217  | 0.805 (0.577–1.124)   | -0.179                           | 0.836 (0.575–1.215)   |
|            | Quartile 3 | -0.189  | 0.827 (0.594–1.154)   | -0.159                           | 0.853 (0.583–1.247)   |
|            | Quartile 4 | -0.449  | 0.639 (0.451–0.904)*  | -0.301                           | 0.740 (0.498–1.100)   |
|            | p-value    |         | 0.093                 |                                  | 0.515                 |
| Iron       | Quartile 1 |         | 1.000 (ref)           |                                  | 1.000 (ref)           |
|            | Quartile 2 | -0.215  | 0.806 (0.578–1.125)   | -0.186                           | 0.831 (0.570–1.211)   |

|           |            |        |                      |        |                      |
|-----------|------------|--------|----------------------|--------|----------------------|
|           | Quartile 3 | -0.158 | 0.854 (0.614–1.187)  | -0.092 | 0.912 (0.629–1.324)  |
|           | Quartile 4 | -0.554 | 0.575 (0.403–0.818)* | -0.562 | 0.570 (0.382–0.851)* |
|           | p-value    |        | 0.022                |        | 0.040                |
|           | Quartile 1 |        | 1.000 (ref)          |        | 1.000 (ref)          |
|           | Quartile 2 | -0.088 | 0.916 (0.655–1.281)  | 0.027  | 1.028 (0.699–1.510)  |
| Zinc      | Quartile 3 | 0.094  | 1.099 (0.792–1.523)  | 0.125  | 1.133 (0.775–1.657)  |
|           | Quartile 4 | -0.576 | 0.562 (0.390–0.811)* | -0.536 | 0.585 (0.382–0.896)* |
|           | p-value    |        | 0.002                |        | 0.010                |
|           | Quartile 1 |        | 1.000 (ref)          |        | 1.000 (ref)          |
|           | Quartile 2 | -0.299 | 0.741 (0.532–1.033)  | -0.270 | 0.763 (0.520–1.120)  |
| Copper    | Quartile 3 | -0.272 | 0.762 (0.548–1.061)  | -0.280 | 0.756 (0.515–1.110)  |
|           | Quartile 4 | -0.570 | 0.566 (0.399–0.802)* | -0.640 | 0.527 (0.350–0.793)* |
|           | p-value    |        | 0.015                |        | 0.024                |
|           | Quartile 1 |        | 1.000 (ref)          |        | 1.000 (ref)          |
|           | Quartile 2 | 0.056  | 1.058 (0.755–1.483)  | 0.041  | 1.042 (0.711–1.529)  |
| Manganese | Quartile 3 | 0.030  | 1.030 (0.734–1.447)  | -0.015 | 0.985 (0.671–1.445)  |
|           | Quartile 4 | -0.175 | 0.839 (0.591–1.191)  | -0.274 | 0.760 (0.510–1.133)  |
|           | p-value    |        | 0.567                |        | 0.389                |

B: coefficient, OR: odd ratio, CI: confidence interval

<sup>‡</sup>adjusted for age, BMI, living status, having a job status, married status, smoking status, alcohol consumption, total energy, hypertension, diabetes, hyperlipidemia; \*p<0.05, \*\*p<0.001
